# Supplementary material
Source: publisher figshare collection journal article supplement (https://gsapubs.figshare.com/ndownloader/files/22743227)
Supplement: Supplementary file 1 [file 22743227]

| Sample #           | Petrographic Position                | $\delta^{13}\text{C}$ | $\delta^{18}\text{O}$ |
|--------------------|--------------------------------------|-----------------------|-----------------------|
| UM1                | basal micrite                        | 0.06                  | -6.87                 |
| UCC1 A             | basal part of 1st band of cement     | 0.32                  | -6.64                 |
| UCC1 B             | middle part of 1st band of cement    | -0.04                 | -6.51                 |
| UCC1 C             | top part of 1st band of cement       | 0.9                   | -6.37                 |
| UCC2 A             | basal part of 2nd band of cement     | 0.07                  | -6.6                  |
| UCC2 B             | top part of 2nd band of cement       | 0.05                  | -6.58                 |
| UCC3               | micrite on top of 2nd band of cement | -0.11                 | -6.77                 |
| UCC3A              | basal part of 3rd band of cement     | 0.16                  | -6.66                 |
| UCC3B              | top part of 3rd band of cement       | 0.35                  | -6.65                 |
| average            |                                      | 0.20                  | -6.63                 |
| standard deviation |                                      | 0.29                  | 0.13                  |

| Sample #           | Petrographic Position       | $\delta^{13}\text{C}$ | $\delta^{18}\text{O}$ |
|--------------------|-----------------------------|-----------------------|-----------------------|
| 2UC1 A             | 1st layer of cement: bottom | 0.24                  | -6.58                 |
| 2UC1 B             | 1st layer of cement: top    | 0.03                  | -6.71                 |
| 2UC2               | 2nd layer of cement         | 0                     | -6.76                 |
| 2UC3               | 3rd layer of cement         | 0.14                  | -6.66                 |
| 2UC4               | 4th layer of cement         | 0.2                   | -6.65                 |
| 2UC5               | 5th layer of cement         | 0.2                   | -6.59                 |
| 2UC6               | 6th layer of cement         | 0.22                  | -6.52                 |
| average            |                             | 0.15                  | -6.64                 |
| standard deviation |                             | 0.09                  | 0.08                  |
